# Supplementary material for: Synthesis and performance of Ti2O3/LiTiO2 decorated micro-scale Si-based composite anode materials for Li-ion batteries
Source: Royal Society of Chemistry journal article supplement (doi:10.1039/d4ce00464g), 2024-01-01
Supplement: d4ce00464g1.pdf [file d4ce00464g1.pdf]

## Synthesis and performance of $Ti_2O_3/LiTiO_2$ decorated micro-scale Si-based composite anode materials for Li-ion batteries

Shuai Wang<sup>1</sup>, Ziyang Ma<sup>1</sup>, Zhenfei Cai<sup>1</sup>, Rui Cao<sup>1</sup>, Yanan Cheng<sup>1</sup>, Qian Lei, Qinyu Wu<sup>1</sup>, Muhmmad Moin<sup>1</sup>, Yangzhou Ma<sup>1\*</sup>, Guangsheng Song<sup>1\*</sup>, Cuie Wen

<sup>1</sup> Key Laboratory of Green Fabrication and Surface Technology of Advanced Metal Materials, Ministry of Education, School of Materials Science and Engineering, Anhui University of Technology, Maanshan, 243000, China

<sup>2</sup> School of Engineering, RMIT University, Melbourne, Victoria 3001, Australia

The process involved in synthesizing  $Ti_2O_3/LiTiO_2$  is described below. Firstly, TBOT is hydrolyzed in ethanol solvent to obtain  $Ti(OH)_4$  (S1), which generates  $TiO_2$  under high temperature treatment (S2). Secondly,  $TiO_2$  interacts with carbon source to generate  $Ti_2O_3$  (S3). And finally,  $Ti_2O_3$  interacts with LiOH to generate  $LiTiO_2$  (S4). The specific reaction equations is as follows<sup>1,2</sup>:

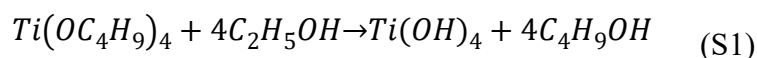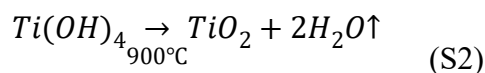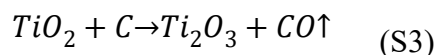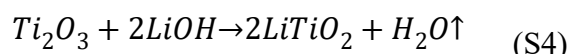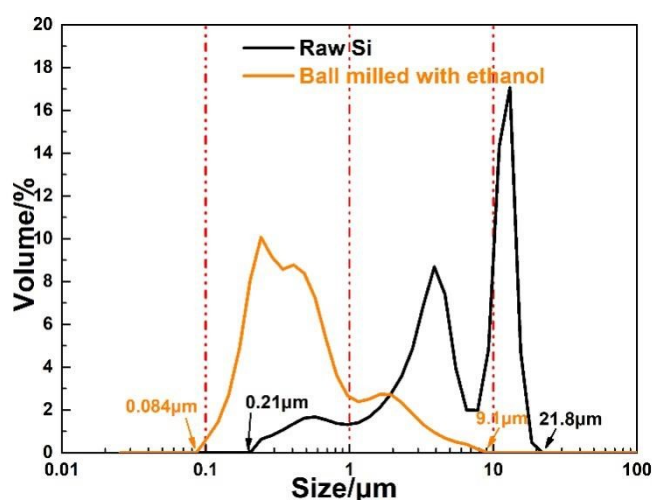

Fig.S1 Particle size distribution curve.

\* Corresponding authors: E-mail addresses: yangzhou.ma@outlook.com (Y.Z. Ma), song\_ahut@163.com (G.S. Song).

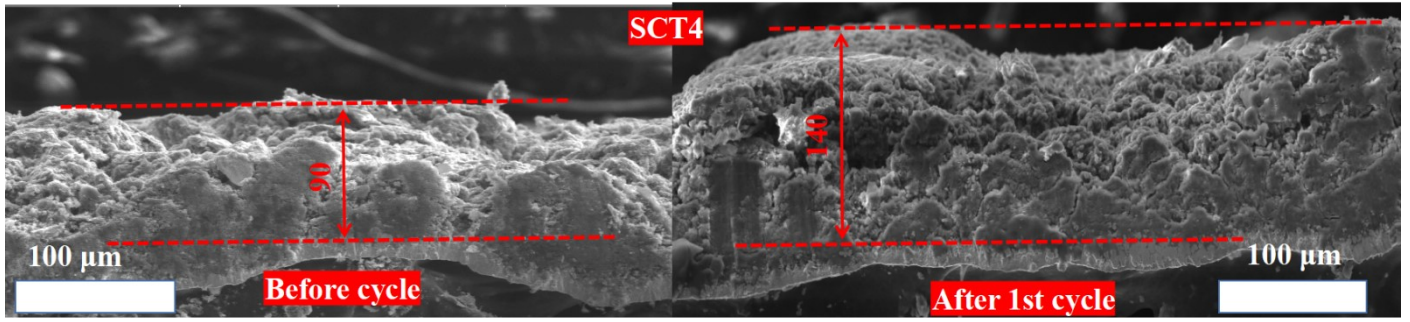

**Fig.S2 SEM images of the thickness of the electrodes before and after cycling**

According to Fick's second law of lithium ion diffusion<sup>3,4</sup>:

$$D_{Li+} = R^2 T^2 / (2A^2 n^4 F^4 C^2 \sigma \omega^2) \quad (S5)$$

$$Z' = R_e + R_{ct} + \sigma \omega * \omega^{-0.5} \quad (S6)$$

Where T is the absolute temperature, R is the gas constant 8.314J (mol/K), A is the surface area of the electrode, n is the number of electrons transferred during the reaction, F is the Faraday constant (96500 C/mol), C is the concentration of Li<sup>+</sup> in the electrode (C = n/V<sub>m</sub>, V<sub>m</sub> is the molar volume of the substance), D<sub>Li<sup>+</sup></sub> is the diffusion coefficient of the lithium ions, and σ is the Warburg coefficient, with slopes in the graphs of the linear relationships between Z' and ω<sup>-1/2</sup> corresponding to σ. From Eq. S6, D<sub>Li<sup>+</sup></sub> is inversely proportional to the square of σ. It is apparent that the D<sub>Li<sup>+</sup></sub> is only related to the Warburg coefficients (ω), which were determined from a linear fit to the low-frequency region:

The calculation of Li<sup>+</sup> diffusion coefficient (D<sub>Li<sup>+</sup></sub>) using the galvanostatic intermittent titration technique (GITT) is based on the following equation S7<sup>5</sup>:

$$D_{Li+} = \frac{4}{\pi \tau} \left( \frac{n_m V_m}{A} \right)^2 \left( \frac{\Delta E_s}{\Delta E_\tau} \right)^2 \quad (S7)$$

Where D represents the D<sub>Li<sup>+</sup></sub> (cm<sup>2</sup>/s), τ represents the duration of the current pulse (s), n<sub>m</sub> represents the number of moles of the active material (mol), V<sub>m</sub> represents the molar volume of the electrode (cm<sup>3</sup>/mol), A is the contact area between the electrode and electrolyte (cm<sup>2</sup>), in this case, the surface area is the actual area of the collector, ΔE<sub>s</sub> is the steady-state voltage change caused by the current pulse (V), ΔE<sub>τ</sub> corresponds to the voltage change during a constant current pulse that ignores the IR decrease (V) .

To obtain a better understanding of the Li-storage mechanism in the material, cyclic voltammetry (CV) curves were further analyzed for the initial three cycles of SC-T6 at a scan rate of 0.1 mV/s over the potential

range of 0.01 to 3 V. As depicted in Figure S3 (a), during the first cathodic scan, a prominent reduction peak emerges around 1.0 V, attributed to irreversible reactions occurring during the electrolyte-electrode surface interaction and SEI film formation. Interestingly, this peak was not observed after the second cycle, thus illustrating this point more fully. An additional reduction peak near 0 V is typically associated with an internal alloying reaction between Si and Li-ions. In contrast, two anodic peaks at 0.34 and 0.51 V are observed, primarily due to the de-lithiation process of the Li-Si alloy, resulting in the conversion of crystalline-Si to amorphous-Si. The intensity of both oxidation and reduction peaks progressively increased with scanning time, indicating the gradual activation of the composite material and enhancement of electrode reaction kinetics. Furthermore, a subtle broadening peak appears around 1.2 V in the second scan, mainly corresponding to the embedded lithium potentials of  $\text{Ti}_2\text{O}_3/\text{LiTiO}_2$  within the composite. The peaks at 1.0 and 2.0 V in the reverse scan signify the removal of Li-ions from the composite. Potentially due to its low content, an SEI film initially forms on the electrode surface during the initial lithiation process, impeding peak observation in the first cycle. For further illustration, an enlarged view of the CV curves of SC-T6 is attached (Fig. S3 (b)), where the position of the delithiation corresponding to  $\text{Ti}_2\text{O}_3/\text{LiTiO}_2$  is determined to be at 2.0 V.

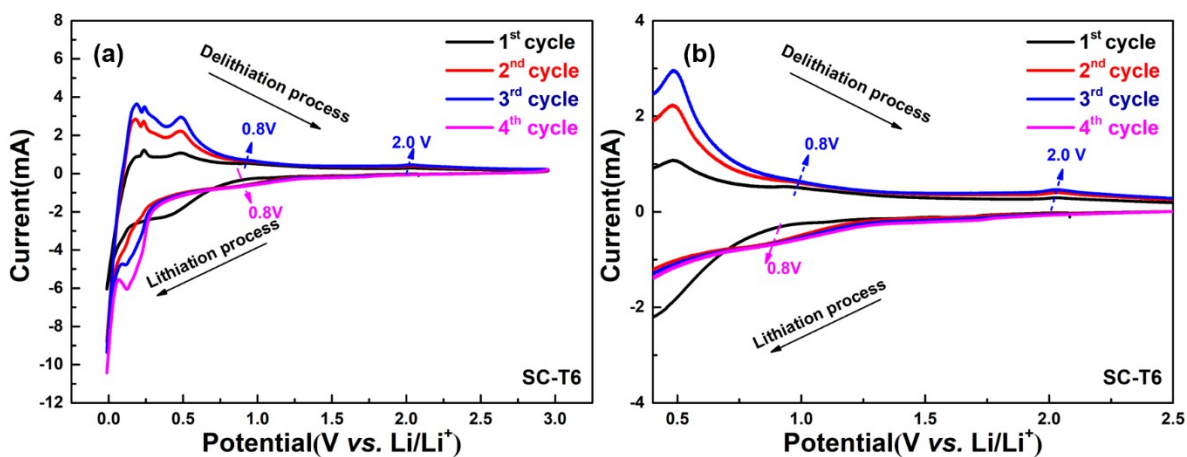

**Fig.S3 CV curves of SC-T6.**

- 1 C. Lu, R. Fang, Y. Gan, X. He, Z. Xiao, H. Huang, J. Zhang, X. Xia, W. Zhang and Y. Xia, *ACS Appl. Mater. Interfaces*, 2024, **16**, 898–906.
- 2 A. R. Park, D.-Y. Son, J. S. Kim, J. Y. Lee, N.-G. Park, J. Park, J. K. Lee and P. J. Yoo, *ACS Appl. Mater. Interfaces*, 2015, **7**, 18483–18490.
- 3 S. Wang, Z. Cai, R. Cao, Z. Ma, Q. Wu, M. Moin, Z. Ahsan, Y. Ma, G. Song, W. Yang and C. Wen, *Dalton Trans.*, 2024, **53**, 4119–4126.

- 4 E. Ghasemiestahbanati, A. Shehzad, K. Konstas, C. J. Setter, L. A. O'Dell, M. Shaibani, M. Majumder and M. R. Hill, *J. Mater. Chem. A*, 2022, **10**, 902–911.
- 5 S. Zhang, Q. Fan, Y. Liu, S. Xi, X. Liu, Z. Wu, J. Hao, W. K. Pang, T. Zhou and Z. Guo, *Advanced Materials*, 2020, **32**, 2000380.
